# Supplementary material
Source: PubMed Central journal article supplement (PMC3088762)

## Characterization of DsbD in *Neisseria meningitidis*

Pradeep Kumar,<sup>1</sup> Soma Sannigrahi,<sup>1</sup> Jessica Scoullar,<sup>2</sup> Charlene M. Kahler<sup>2</sup> and Yih-Ling Tzeng<sup>1\*</sup>

1. Department of Medicine, Emory University School of Medicine, Atlanta, GA, USA

2. University of Western Australia, Perth, WA, Australia

\*Corresponding author. Mailing address: Emory University School of Medicine, Whitehead

Research Building, Rm 245, 615 Michael Street, Atlanta, GA 30322. Phone: (404) 727-8393.

Fax: (404) 712-2278. Email: [ytzeng@emory.edu](mailto:ytzeng@emory.edu)

**Table S1. Primers used in this study**

| Name      | Sequence (5'-3')                          | Note             |
|-----------|-------------------------------------------|------------------|
| YT143     | GGGCAGCCAGTCGGTGTCCAGATG                  | dsbD promoter    |
| YT144     | CCTTTTCCGGCGGCAGCAGAT                     | dsbD promoter    |
| dsbD-f2   | GGGAATTCGGTATTCGGGATGGGCTTCG              | dsbD promoter    |
| dsbD-f3   | GGGAATTCGAAAAAGCGGCGGACATCG               | dsbD promoter    |
| dsbD-f4   | GGGAATTCGGTTCGGATAATGGCGGGTT              | dsbD promoter    |
| dsbD-f5   | CGGAATTC AATGCAGACAAATTATTTGTCTGA         | dsbD promoter    |
| dsbD-f6   | CGGAATTC TAAATCCCACCGTCAACCTTAC           | dsbD promoter    |
| dsbD-r1   | GGGAATTCCTTTTCCGGCGGCAGCAGAT              | dsbD promoter    |
| dsbD-PE1  | CGAAAGCTCGTCCGCACAACATCAAAAATAC           | Primer extension |
| dsbD-qF1  | GTTGGGACAGCCTTCTTTCA                      | qRT-PCR          |
| dsbD-qR1  | TTGCATAAGGAAAGGCAACC                      | qRT-PCR          |
| dsbA1-qF1 | TTGAGCGAGCACATCAAAAC                      | qRT-PCR          |
| dsbA1-qR1 | TGATTAACCATCGCATCGAA                      | qRT-PCR          |
| dsbA2-F2a | TATTTTCGATGCGATGGTCA                      | qRT-PCR          |
| dsbA2-R2  | GATTTGGAAGTTTCGGTCA                       | qRT-PCR          |
| dsbA3-qF1 | TGCGTACATTGCCATCATTT                      | qRT-PCR          |
| dsbA3-qR1 | GAGACAAAGCCCATTTTTTCG                     | qRT-PCR          |
| dsbB-qF1  | TGTTGCGGCATATCAGTTGT                      | qRT-PCR          |
| dsbB-qR1  | CACAAGTATATGCCGCAAC                       | qRT-PCR          |
| dsbC-qF1  | CTATTCGCCCCAAGATTTGA                      | qRT-PCR          |
| dsbC-qR1  | TTCTTCGGTCAGGTTTTTGC                      | qRT-PCR          |
| 16sRTF    | CCATCGGTATTCCTCCACATCTCT                  | qRT-PCR          |
| 16sRTR    | CGTAGGGTGCAGCGTTAATC                      | qRT-PCR          |
| 5Dkan-F   | CGCCAGTGCCTCCATCATTTCTGT                  | dsbD mutation    |
| 5Dkan-R   | TTCCTCCTAGTTAGTCACCCCTTTTCCGGCGGCAGCAGATC | dsbD mutation    |
| 3Dkan-F   | CCTGGAGGGAATAATGACCCCGCGCTGCACCATTTCTGA   | dsbD mutation    |
| 3Dkan-R   | TTGCCTCGCCTTGCCGTAATCTGT                  | dsbD mutation    |

|                 |                                                    |                          |
|-----------------|----------------------------------------------------|--------------------------|
| aphA3-cla-f2    | AAAGCGATCGAT <u>CCCGGGT</u> GACTAACTAGGAGGAA       | dsbD mutation            |
| aphA3-cla-r2    | AAAGCGATCGAT <u>CCCGGGT</u> CATTATCCCTCCAGG        | dsbD mutation            |
| dsbD-5'-PacI    | <u>CCTTAATTA</u> ATTGTCTGAAACGGATTTCGATTATGAA      | complementation          |
| dsbD-3-PmeI     | AGCTTT <u>GTTTAAACT</u> CAGCGGTTTTGTTTCATACCACTCGA | complementation          |
| dsbD-For        | GCGCGGGCGTTTGTGCTGTC                               | Southern blot            |
| dsbD-Rev        | GCCGGTGCCCAACGCCAAAGT                              | Southern blot            |
| $\Delta$ dsbD-F | ATTTTCATGCGGGTTCAATCTGGCT                          | dsbD mutation            |
| $\Delta$ dsbD-R | CGTACTATCTGTACTGTCTGCGGCTTCG                       | dsbD mutation            |
| DAP275          | CGGAATTCCGTTGGAAGCCGAGTTGCAAAATGC                  | dsbA1 mutation           |
| DAP263          | CCCAAGCTTGCTGTTTGACATGGTCAATGTGCC                  | dsbA1 mutation           |
| DAP418          | TGTTTCATCACGCGGTGACCG                              | dsbA1 mutation           |
| DAP140          | CCTGTCTAGCTTCAAGTATGACG                            | $\Omega$ specific primer |
| DAP201          | GATGAAGATG TTCAGCGGCAACG                           | dsbA2 mutation           |
| DAP292          | GACCGTAGGCATGGATTACAGC                             | dsbA2 mutation           |
| DAP285          | CTACGATATGCGCGGTGAAAGC                             | dsbA2 mutation           |
| DAP420          | CGACGTATTGACCCTGATTGAAGACG                         | dsbA2 mutation           |
| DAP268          | CGGAATTCCCAGCATCGAAAAAGCGTGCAAGTGC                 | DsbA3 mutation           |
| DAP269          | CCCAAGCTTGCAAACACTACCGCCAAAACCTGC                  | DsbA3 mutation           |
| DAP267          | CAAACCAACCCCGGAACAAATCC                            | DsbA3 mutation           |
| DAP265          | CCAGCATGACTGCAACACTCAAGG                           | DsbA3 mutation           |

**Fig. S1.** PCR analyses of the *dsbD* locus. Primers annealing to the ends of *dsbD* coding sequence (*dsbD*-PacI and *dsbD*-PmeI) were used in PCR amplification. The incorrect *dsbD* mutants display a doublet pattern, while the correct *dsbD* mutants yield a single shorter PCR product resulting from the *dsbD::aphA3* deletion-insertional mutation. 1) wild type control, 2) the incorrect (*dsbD*\*) mutant obtained from the wild type strain, 3) the correct *dsbD* mutant created in the complemented strain, 4) the *dsbD*\* mutation in the *dsbA1* strain, 5) *dsbD*\* mutation in the *dsbA2* strain, 6) *dsbD*\* mutation in the *dsbA2A3* strain, 7) *dsbD* mutation in the *dsbA2A1* strain, 8) *dsbD* mutation in the *dsbA2A1A3* strain.

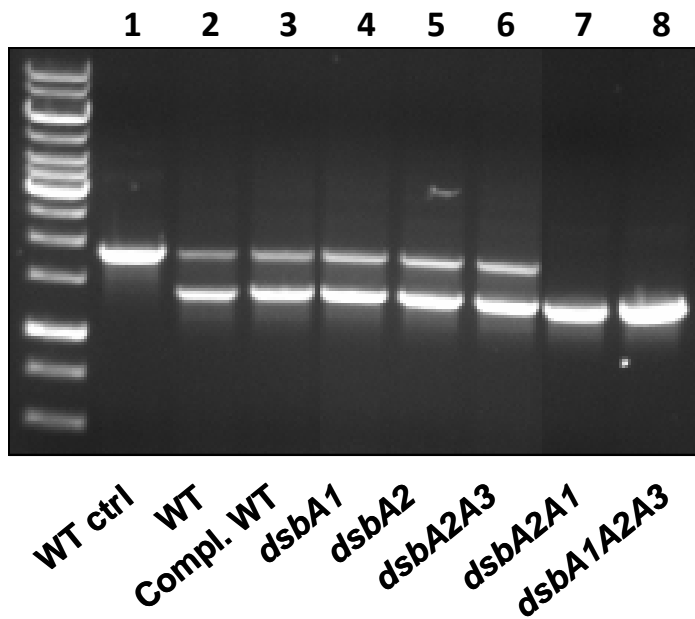

**Fig. S2.** The correct *dsbD* mutation cannot be obtained from transformation of the wild type strain in the presence of DTT supplementation. The transformants were selected on agar plates supplemented with varied concentrations of DTT, and examined with colony PCR using primers *dsbD*-PacI and *dsbD*-PmeI. All Kan<sup>R</sup> transformants isolated from various DTT supplemented plates showed the doublet patterns indicative of the incorrect *dsbD* mutation.

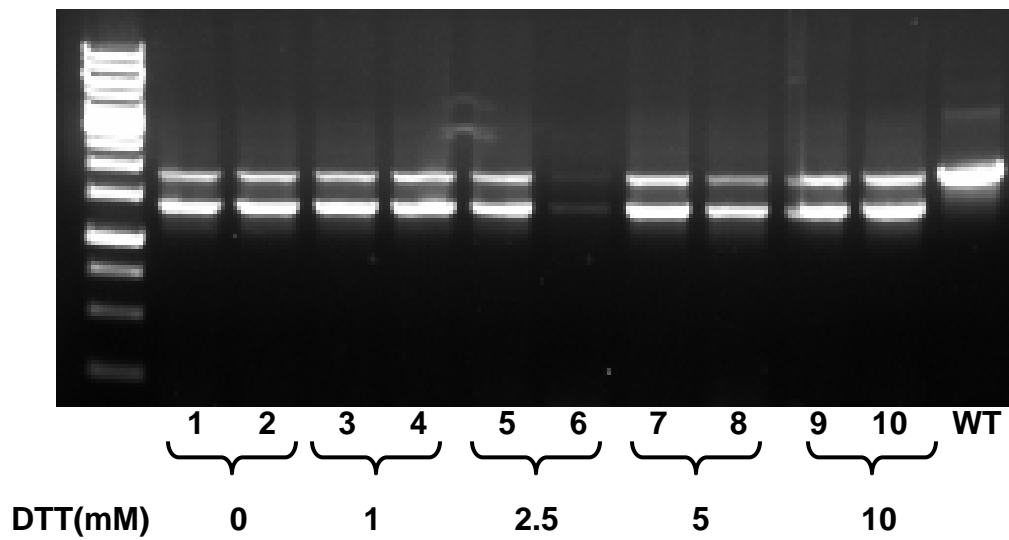

Supplement: NIHMS286485-supplement-Supp_Figure_S1-S2_Table_S1.pdf [file NIHMS286485-supplement-Supp_Figure_S1-S2_Table_S1.pdf]
